# Supplementary material for: Literature Review of the Contribution of Remote Sensing Exposures to Asthma, Other Respiration Specific Outcomes, and Risk Factors in Greenness, Air Pollution, and Wildfire Ecologic Settings
Source: Preprints.org preprint supplement (doi:10.20944/preprints202410.0917.v1), 2024-10-12
Supplement: Supplementary file 1 [file supplementary]

Braggio JT, Literature Review of the Contribution of Remote Sensing Exposures to Asthma, Other Respiration Specific Outcomes, and Risk Factors in Greenness, Air Pollution, and Wildfire Ecologic Settings, *Atmosphere* 2024, Supplementary File, Tables S1-S9.

### Table of Contents

- 1) Table S1: Associations Between Selected Variables and Risk Factors with the Significant Outcome Group: Respiration Group of Asthma and Ecologic Setting of Greenness.
- 2) Table S2: Associations Between Selected Variables and Risk Factors with the Significant Outcome Group: Respiration Group of Asthma and Ecologic Setting of Air Pollution.
- 3) Table S3: Associations Between Selected Variables and Risk Factors with the Significant Outcome Group: Respiration Group of Asthma and Ecologic Setting of Wildfire.
- 4) Table S4: Associations Between Selected Variables and Risk Factors with the Significant Outcome Group: Respiration Group of Other Respiration and Ecologic Setting of Greenness.
- 5) Table S5: Associations Between Selected Variables and Risk Factors with the Significant Outcome Group: Respiration Group of Other Respiration and Ecologic Setting of Air Pollution.
- 6) Table S6: Associations Between Selected Variables and Risk Factors with the Significant Outcome Group: Respiration Group of Other Respiration and Ecologic Setting of Wildfire.
- 7) Table S7: AOD-PM<sub>2.5</sub>, AOD-PM<sub>10</sub>, and AOD-NO<sub>2</sub> Means by Health Outcome, Ecologic Setting, and the Health Outcome by Ecologic Setting Interaction.
- 8) Table S8: Analysis of Individual and Multiple Physiologic Mechanisms of Immune, Inflammation, and Oxidative Stress by Health Outcome and Ecologic Setting Main Effects.
- 9) Table S9: Analysis of Individual Physiologic Mechanisms of Immune, Inflammation, and Oxidative Stress by Health Outcome and Ecologic Setting.

Table S1: Associations Between Selected Variables and Risk Factors with the Significant Outcome Group: Respiration Group of Asthma and Ecologic Setting of Greenness.

| VARIABLES <sup>1</sup>           | SIGNIFICANT OUTCOME GROUP <sup>2</sup> |           |          | COMMENTS                                                                                                                                                                         |
|----------------------------------|----------------------------------------|-----------|----------|----------------------------------------------------------------------------------------------------------------------------------------------------------------------------------|
|                                  | NS                                     | SL        | SH       |                                                                                                                                                                                  |
| Respiration Group <sup>d</sup>   |                                        |           |          | Selection of the asthma study participants.                                                                                                                                      |
| Asthma                           | 9 (29.0)                               | 14 (45.2) | 8 (25.8) |                                                                                                                                                                                  |
| Ecologic Setting <sup>d</sup>    |                                        |           |          | Selection of the greenness ecologic setting.                                                                                                                                     |
| Greenness                        | 9 (29.0)                               | 14 (45.2) | 8 (25.8) |                                                                                                                                                                                  |
| Publication Year <sup>c</sup>    |                                        |           |          | Publication year was not significant.                                                                                                                                            |
| 2009-2016                        | 1 (3.2)                                | 0 (0.0)   | 1 (3.2)  |                                                                                                                                                                                  |
| 2017-2023                        | 8 (25.8)                               | 14 (45.2) | 7 (22.6) |                                                                                                                                                                                  |
| Country <sup>b</sup>             |                                        |           |          | Country was significant. Italy had the highest number outcomes in the SL group, while the United States had the highest number of outcomes in the SH group than other countries. |
| Australia                        | 0 (0.0)                                | 0 (0.0)   | 1 (3.2)  |                                                                                                                                                                                  |
| China                            | 0 (0.0)                                | 2 (6.4)   | 0 (0.0)  |                                                                                                                                                                                  |
| Italy                            | 4 (12.9)                               | 7 (22.6)  | 0 (0.0)  |                                                                                                                                                                                  |
| Lithuania                        | 0 (0.0)                                | 0 (0.0)   | 1 (3.2)  |                                                                                                                                                                                  |
| Norway                           | 1 (3.2)                                | 1 (3.2)   | 0 (0.0)  |                                                                                                                                                                                  |
| Spain                            | 1 (3.2)                                | 0 (0.0)   | 1 (3.2)  |                                                                                                                                                                                  |
| United States                    | 3 (9.7)                                | 4 (12.9)  | 5 (16.1) |                                                                                                                                                                                  |
| Design <sup>b</sup>              |                                        |           |          | Design was significant. More cross sectional design specific outcomes in the SL group.                                                                                           |
| Case Control                     | 1 (3.2)                                | 1 (3.2)   | 2 (6.4)  |                                                                                                                                                                                  |
| Cross Sectional                  | 6 (19.4)                               | 9 (29.0)  | 2 (6.4)  |                                                                                                                                                                                  |
| Prospective Cohort               | 2 (6.4)                                | 4 (12.9)  | 4 (12.9) | Surveillance was significant, with prevalence specific outcomes occurring more often than incidence.                                                                             |
| Surveillance <sup>a</sup>        |                                        |           |          |                                                                                                                                                                                  |
| Incidence                        | 1 (3.2)                                | 4 (12.9)  | 1 (3.2)  |                                                                                                                                                                                  |
| Prevalence                       | 8 (25.8)                               | 9 (29.0)  | 7 (22.6) | ICD-CM was not significant.                                                                                                                                                      |
| Other                            | 0 (0.0)                                | 1 (3.2)   | 0 (0.0)  |                                                                                                                                                                                  |
| ICD-CM <sup>c</sup>              |                                        |           |          |                                                                                                                                                                                  |
| 9                                | 2 (6.4)                                | 6 (19.4)  | 2 (6.4)  | Questionnaire Dx was not significant.                                                                                                                                            |
| Other                            | 7 (22.6)                               | 8 (25.8)  | 6 (19.4) |                                                                                                                                                                                  |
| Questionnaire Dx <sup>c</sup>    |                                        |           |          | Medical Dx was not significant.                                                                                                                                                  |
| No                               | 5 (16.1)                               | 9 (29.0)  | 6 (19.4) |                                                                                                                                                                                  |
| Yes                              | 4 (12.9)                               | 5 (16.1)  | 2 (6.4)  | Outcome could not be evaluated statistically.                                                                                                                                    |
| Medical Dx <sup>c</sup>          |                                        |           |          |                                                                                                                                                                                  |
| No                               | 7 (22.6)                               | 8 (25.8)  | 6 (19.4) | Lung studies variable was not significant.                                                                                                                                       |
| Yes                              | 2 (6.4)                                | 6 (19.4)  | 2 (6.4)  |                                                                                                                                                                                  |
| Preexposure Studies <sup>d</sup> |                                        |           |          |                                                                                                                                                                                  |
| No                               | 9 (29.0)                               | 14 (45.2) | 8 (25.8) |                                                                                                                                                                                  |
| Lung Studies <sup>c</sup>        |                                        |           |          |                                                                                                                                                                                  |
| No                               | 5 (16.1)                               | 9 (29.0)  | 4 (12.9) |                                                                                                                                                                                  |
| Yes                              | 4 (12.9)                               | 5 (16.1)  | 4 (12.9) |                                                                                                                                                                                  |
| Psychologic Studies <sup>c</sup> |                                        |           |          |                                                                                                                                                                                  |

|                                  |          |           |          |                                                                                             |
|----------------------------------|----------|-----------|----------|---------------------------------------------------------------------------------------------|
| No                               | 8 (25.8) | 12 (38.7) | 8 (25.8) | Psychologic studies variable was not significant.                                           |
| Yes                              | 1 (3.2)  | 2 (6.4)   | 0 (0.0)  |                                                                                             |
| Age <sup>a</sup>                 |          |           |          | Age risk factor was significant, with all outcomes in the SL group.                         |
| No                               | 9 (29.0) | 10 (32.3) | 8 (25.8) |                                                                                             |
| Yes                              | 0 (0.0)  | 4 (12.9)  | 0 (0.0)  | Education/income risk factor was not significant.                                           |
| Education/Income <sup>c</sup>    |          |           |          |                                                                                             |
| No                               | 9 (29.0) | 13 (41.9) | 8 (25.8) | Education/income risk factor was not significant.                                           |
| Yes                              | 0 (0.0)  | 1 (3.2)   | 0 (0.0)  |                                                                                             |
| Ethnicity/Race <sup>c</sup>      |          |           |          | Ethnicity/race risk factor was not significant.                                             |
| No                               | 9 (29.0) | 13 (41.9) | 7 (22.6) |                                                                                             |
| Yes                              | 0 (0.0)  | 1 (3.2)   | 1 (3.2)  | Environmental risk factor was significant, with more outcomes in the SL group.              |
| Environmental <sup>b</sup>       |          |           |          |                                                                                             |
| No                               | 6 (19.4) | 3 (9.7)   | 1 (3.2)  | Environmental risk factor was significant, with more outcomes in the SL group.              |
| Yes                              | 3 (9.7)  | 11 (35.5) | 7 (22.6) |                                                                                             |
| Gender <sup>c</sup>              |          |           |          | Gender risk factor was not significant.                                                     |
| No                               | 9 (29.0) | 11 (35.5) | 8 (25.8) |                                                                                             |
| Yes                              | 0 (0.0)  | 3 (9.7)   | 0 (0.0)  | Geographic risk factor was not significant.                                                 |
| Geographic <sup>c</sup>          |          |           |          |                                                                                             |
| No                               | 9 (29.0) | 12 (38.7) | 7 (22.6) | Geographic risk factor was not significant.                                                 |
| Yes                              | 0 (0.0)  | 2 (6.4)   | 1 (3.2)  |                                                                                             |
| Psychologic <sup>a</sup>         |          |           |          | Psychologic risk factor was significant, with more outcomes in the SL group.                |
| No                               | 9 (29.0) | 10 (32.3) | 7 (22.6) |                                                                                             |
| Yes                              | 0 (0.0)  | 4 (12.9)  | 1 (3.2)  | Other risk factor was not significant.                                                      |
| Other <sup>c</sup>               |          |           |          |                                                                                             |
| No                               | 7 (22.6) | 8 (25.8)  | 5 (16.1) | Other risk factor was not significant.                                                      |
| Yes                              | 2 (6.4)  | 6 (19.4)  | 3 (9.7)  |                                                                                             |
| Single Mechanisms <sup>a</sup>   |          |           |          | Single physiologic mechanisms variable was significant, with most outcomes in the SL group. |
| Immune (IM)                      | 1 (5.0)  | 2 (10.0)  | 1 (5.0)  |                                                                                             |
| Oxidative Stress (OS)            | 1 (5.0)  | 3 (15.0)  | 0 (0.0)  | Outcome could not be evaluated statistically.                                               |
| Other (OT)                       | 5 (25.0) | 6 (30.0)  | 1 (5.0)  |                                                                                             |
| Multiple Mechanisms <sup>d</sup> |          |           |          | Outcome could not be evaluated statistically.                                               |
| IMIN                             | 2 (18.2) | 3 (27.3)  | 6 (54.6) |                                                                                             |

<sup>1</sup>Abbreviations: immune-inflammation, IMIN. <sup>2</sup>Significant outcome group: not significant, NS; significantly lower, SL; significantly higher, SH. Each cell entry includes totals (percentages). Significance evaluated with the Chi-Square test,  $p$ : a,  $\leq 0.05$ ; b,  $\leq 0.01$ ; c,  $> 0.05$ ; bold superscript identifies the use of the exact estimate; d, variable was not evaluated statistically.

Table S2: Associations Between Selected Variables and Risk Factors with the Significant Outcome Group: Respiration Group of Asthma and Ecologic Setting of Air Pollution.

| VARIABLES <sup>1</sup>         | SIGNIFICANT OUTCOME GROUP <sup>2</sup> |         |           | COMMENTS                                                                                                                                                                                                      |
|--------------------------------|----------------------------------------|---------|-----------|---------------------------------------------------------------------------------------------------------------------------------------------------------------------------------------------------------------|
|                                | NS                                     | SL      | SH        |                                                                                                                                                                                                               |
| Respiration Group <sup>d</sup> |                                        |         |           | Selection of asthma study participants.                                                                                                                                                                       |
| Asthma                         | 25 (33.3)                              | 4 (5.3) | 46 (61.3) |                                                                                                                                                                                                               |
| Ecologic Setting <sup>d</sup>  |                                        |         |           | Selection of the air pollution ecologic setting.                                                                                                                                                              |
| Air Pollution                  | 25 (33.3)                              | 4 (5.3) | 46 (61.3) |                                                                                                                                                                                                               |
| Publication Year <sup>c</sup>  |                                        |         |           | Publication year was not significant.                                                                                                                                                                         |
| 2009-2016                      | 4 (5.3)                                | 0 (0.0) | 11 (14.7) |                                                                                                                                                                                                               |
| 2017-2023                      | 21 (28.0)                              | 4 (5.3) | 35 (46.7) |                                                                                                                                                                                                               |
| Country <sup>b</sup>           |                                        |         |           | Country was significant. There were more countries with SH than SL outcomes. The four counties with more SH outcomes were Canada and the United States (n=10 each), followed by Italy (n=9), and China (n=7). |
| 2+ Countries                   | 3 (4.0)                                | 0 (0.0) | 2 (2.7)   |                                                                                                                                                                                                               |
| Australia                      | 3 (4.0)                                | 0 (0.0) | 4 (5.3)   |                                                                                                                                                                                                               |
| Canada                         | 1 (1.3)                                | 1 (1.3) | 10 (13.3) |                                                                                                                                                                                                               |
| China                          | 8 (10.7)                               | 3 (4.0) | 7 (9.3)   |                                                                                                                                                                                                               |
| Italy                          | 7 (9.3)                                | 0 (0.0) | 9 (12.0)  |                                                                                                                                                                                                               |
| Mexico                         | 0 (0.0)                                | 0 (0.0) | 1 (1.3)   |                                                                                                                                                                                                               |
| Peru                           | 0 (0.0)                                | 0 (0.0) | 2 (2.7)   |                                                                                                                                                                                                               |
| Taiwan                         | 0 (0.0)                                | 0 (0.0) | 1 (1.3)   |                                                                                                                                                                                                               |
| United States                  | 3 (4.0)                                | 0 (0.0) | 10 (13.3) |                                                                                                                                                                                                               |
| Design <sup>b</sup>            |                                        |         |           | Design was significant. Cross sectional design was used more often (n=41) than the retrospective cohort (n=13).                                                                                               |
| Case Control                   | 1 (1.3)                                | 0 (0.0) | 5 (6.7)   |                                                                                                                                                                                                               |
| Cross Sectional                | 18 (24.0)                              | 3 (4.0) | 20 (26.7) |                                                                                                                                                                                                               |
| Panel                          | 0 (0.0)                                | 0 (0.0) | 1 (1.3)   |                                                                                                                                                                                                               |
| Prospective Cohort             | 2 (2.7)                                | 1 (1.3) | 5 (6.7)   |                                                                                                                                                                                                               |
| Retrospective Cohort           | 3 (4.0)                                | 0 (0.0) | 10 (13.3) |                                                                                                                                                                                                               |
| Time Series                    | 1 (1.3)                                | 0 (0.0) | 5 (6.7)   | Surveillance was significant, with prevalence used more often than incidence.                                                                                                                                 |
| Surveillance <sup>a</sup>      |                                        |         |           |                                                                                                                                                                                                               |
| Incidence                      | 5 (6.7)                                | 1 (1.3) | 15 (20.0) |                                                                                                                                                                                                               |
| Prevalence                     | 20 (26.7)                              | 3 (4.0) | 31 (41.3) | ICD-9-CM was significant, with the 9 <sup>th</sup> edition used more often than the 10 <sup>th</sup> edition.                                                                                                 |
| ICD-CM <sup>b</sup>            |                                        |         |           |                                                                                                                                                                                                               |
| 9                              | 2 (2.7)                                | 0 (0.0) | 16 (21.3) |                                                                                                                                                                                                               |
| 10                             | 2 (2.7)                                | 1 (1.3) | 8 (10.7)  |                                                                                                                                                                                                               |
| Other                          | 21 (28.0)                              | 3 (4.0) | 22 (29.3) | Questionnaire Dx was significant, with more outcomes in the SH (n=21) than in the SL (n=3) group.                                                                                                             |
| Questionnaire Dx <sup>b</sup>  |                                        |         |           |                                                                                                                                                                                                               |
| No                             | 4 (5.3)                                | 1 (1.3) | 24 (32.0) |                                                                                                                                                                                                               |
| Yes                            | 21 (28.0)                              | 3 (4.0) | 21 (28.0) |                                                                                                                                                                                                               |
| Other                          | 0 (0.0)                                | 0 (0.0) | 1 (1.3)   | Medical Dx was significant, with more outcomes in the SH                                                                                                                                                      |
| Medical Dx <sup>b</sup>        |                                        |         |           |                                                                                                                                                                                                               |
| No                             | 15 (20.0)                              | 3 (4.0) | 18 (24.0) |                                                                                                                                                                                                               |
| Yes                            | 4 (5.3)                                | 1 (1.3) | 24 (32.0) |                                                                                                                                                                                                               |

|                                  |           |          |           |                                                                                               |
|----------------------------------|-----------|----------|-----------|-----------------------------------------------------------------------------------------------|
| Other                            | 6 (8.0)   | 0 (0.0)  | 4 (5.3)   | (n=24) than in the SL (n=1) group.                                                            |
| Preexposure Studies <sup>a</sup> |           |          |           | Preexposure studies variable was significant, with all seven outcomes in the SH group.        |
| No                               | 25 (33.3) | 4 (5.3)  | 39 (52.0) |                                                                                               |
| Yes                              | 0 (0.0)   | 0 (0.0)  | 7 (9.3)   |                                                                                               |
| Lung Studies <sup>b</sup>        |           |          |           | Lung studies variable was significant, with most in the SL (n=3) group.                       |
| No                               | 15 (20.0) | 1 (1.3)  | 45 (60.0) |                                                                                               |
| Yes                              | 10 (13.3) | 3 (4.0)  | 1 (1.3)   |                                                                                               |
| Psychologic Studies <sup>c</sup> |           |          |           | Psychologic studies variable was not significant.                                             |
| No                               | 25 (33.3) | 4 (5.3)  | 44 (58.7) |                                                                                               |
| Yes                              | 0 (0.0)   | 0 (0.0)  | 2 (2.7)   |                                                                                               |
| Age <sup>c</sup>                 |           |          |           | Age risk factor was not significant.                                                          |
| No                               | 25 (33.3) | 4 (5.3)  | 41 (54.7) |                                                                                               |
| Yes                              | 0 (0.0)   | 0 (0.0)  | 5 (6.7)   |                                                                                               |
| Education/Income <sup>c</sup>    |           |          |           | Education/income risk factor was not significant.                                             |
| No                               | 25 (33.3) | 4 (5.3)  | 43 (57.3) |                                                                                               |
| Yes                              | 0 (0.0)   | 0 (0.0)  | 3 (4.0)   |                                                                                               |
| Ethnicity/Race <sup>c</sup>      |           |          |           | Ethnicity/race risk factor was not significant.                                               |
| No                               | 25 (33.3) | 4 (5.3)  | 43 (57.3) |                                                                                               |
| Yes                              | 0 (0.0)   | 0 (0.0)  | 3 (4.0)   |                                                                                               |
| Environmental <sup>b</sup>       |           |          |           | Environmental risk factor was significant, with more outcomes in the SH group.                |
| No                               | 21 (28.0) | 0 (0.0)  | 1 (1.3)   |                                                                                               |
| Yes                              | 4 (5.3)   | 4 (5.3)  | 45 (60.0) |                                                                                               |
| Gender <sup>a</sup>              |           |          |           | Gender risk factor was significant, with all outcomes in the SH (n=6) group.                  |
| No                               | 25 (33.3) | 4 (5.3)  | 40 (53.3) |                                                                                               |
| Yes                              | 0 (0.0)   | 0 (0.0)  | 6 (8.0)   |                                                                                               |
| Geographic <sup>c</sup>          |           |          |           | Geographic risk factor was not significant.                                                   |
| No                               | 24 (32.0) | 4 (5.3)  | 40 (53.3) |                                                                                               |
| Yes                              | 1 (1.3)   | 0 (0.0)  | 6 (8.0)   |                                                                                               |
| Psychologic <sup>c</sup>         |           |          |           | Psychologic risk factor was not significant.                                                  |
| No                               | 25 (33.3) | 4 (5.3)  | 44 (58.7) |                                                                                               |
| Yes                              | 0 (0.0)   | 0 (0.0)  | 2 (2.7)   |                                                                                               |
| Other <sup>c</sup>               |           |          |           | Other risk factor was not significant.                                                        |
| No                               | 24 (32.0) | 4 (5.3)  | 40 (53.3) |                                                                                               |
| Yes                              | 1 (1.3)   | 0 (0.0)  | 6 (8.0)   |                                                                                               |
| Single Mechanisms <sup>a</sup>   |           |          |           | Single physiologic mechanisms variable was significant, with all outcomes in the SH group.    |
| Immune (IM)                      | 3 (7.3)   | 0 (0.0)  | 12 (29.3) |                                                                                               |
| Oxidative Stress (OS)            | 1 (2.4)   | 0 (0.0)  | 1 (2.4)   |                                                                                               |
| Other (OT)                       | 10 (24.4) | 0 (0.0)  | 14 (34.2) |                                                                                               |
| Multiple Mechanisms <sup>a</sup> |           |          |           | Multiple physiologic mechanisms variable was significant, with more outcomes in the SH group. |
| IMIN                             | 1 (2.9)   | 0 (0.0)  | 4 (11.8)  |                                                                                               |
| IMINOS                           | 8 (23.5)  | 4 (11.8) | 11 (32.4) |                                                                                               |
| INOS                             | 2 (5.9)   | 0 (0.0)  | 4 (11.8)  |                                                                                               |

<sup>1</sup>Abbreviations: immune-inflammation, IMIN; immune-inflammation-oxidative stress, IMINOS; inflammation-oxidative stress, INOS. <sup>2</sup>Significant outcome group: not significant, NS;

significantly lower, SL; significantly higher, SH. Each entry includes totals (percentages). Significance evaluated with the Chi-Square test,  $p$ : a,  $\leq 0.05$ ; b,  $\leq 0.01$ ; c,  $> 0.05$ ; bold superscript identifies the use of the exact estimate; d, variable not evaluated statistically.

Table S3: Associations Between Selected Variables and Risk Factors with the Significant Outcome Group: Respiration Group of Asthma and Ecologic Setting of Wildfire.

| VARIABLES <sup>1</sup>           | SIGNIFICANT OUTCOME GROUP <sup>2</sup> |           | COMMENTS                                                                                                              |
|----------------------------------|----------------------------------------|-----------|-----------------------------------------------------------------------------------------------------------------------|
|                                  | NS                                     | SH        |                                                                                                                       |
| Respiration Group <sup>d</sup>   |                                        |           | Selection of asthma study participants.                                                                               |
| Asthma                           | 5 (27.8)                               | 13 (72.2) |                                                                                                                       |
| Ecologic Setting <sup>d</sup>    |                                        |           | Selection of wildfire ecologic setting.                                                                               |
| Wildfire                         | 5 (27.8)                               | 13 (72.2) |                                                                                                                       |
| Publication Year <sup>c</sup>    |                                        |           | Publication year was not significant.                                                                                 |
| 2009-2016                        | 0 (0.0)                                | 3 (16.7)  |                                                                                                                       |
| 2017-2023                        | 5 (27.8)                               | 10 (55.6) |                                                                                                                       |
| Country <sup>c</sup>             |                                        |           | Country was not significant.                                                                                          |
| Canada                           | 0 (0.0)                                | 1 (5.6)   |                                                                                                                       |
| Indonesia                        | 0 (0.0)                                | 1 (5.6)   |                                                                                                                       |
| United States                    | 5 (27.8)                               | 11 (61.1) |                                                                                                                       |
| Design <sup>a</sup>              |                                        |           | Design was significant, with more case control (n=8) outcomes in the SH group.                                        |
| Case Control                     | 1 (5.6)                                | 8 (44.4)  |                                                                                                                       |
| Cross Sectional                  | 4 (22.2)                               | 3 (16.7)  |                                                                                                                       |
| Time Series                      | 0 (0.0)                                | 2 (11.1)  |                                                                                                                       |
| Surveillance <sup>d</sup>        |                                        |           | Outcome could not be evaluated statistically.                                                                         |
| Prevalence                       | 5 (27.8)                               | 13 (72.2) |                                                                                                                       |
| ICD-CM <sup>a</sup>              |                                        |           | ICD-CM was significant, with more 9 <sup>th</sup> (n=9) than 10 <sup>th</sup> (n=2) edition outcomes in the SH group. |
| 9                                | 1 (5.6)                                | 9 (50.0)  |                                                                                                                       |
| 10                               | 0 (0.0)                                | 2 (11.1)  |                                                                                                                       |
| Other                            | 4 (22.2)                               | 2 (11.1)  |                                                                                                                       |
| Questionnaire Dx <sup>c</sup>    |                                        |           | Questionnaire Dx was not significant.                                                                                 |
| No                               | 4 (22.2)                               | 13 (72.2) |                                                                                                                       |
| Yes                              | 1 (5.6)                                | 0 (0.)    |                                                                                                                       |
| Medical Dx <sup>a</sup>          |                                        |           | Medical Dx was significant, with most outcomes in the SH (n=11) group.                                                |
| No                               | 4 (22.2)                               | 2 (11.1)  |                                                                                                                       |
| Yes                              | 1 (5.6)                                | 11 (61.1) |                                                                                                                       |
| Preexposure Studies <sup>d</sup> |                                        |           | Outcome could not be evaluated statistically.                                                                         |
| No                               | 5 (27.8)                               | 13 (72.2) |                                                                                                                       |
| Lung Studies <sup>b</sup>        |                                        |           | Lung studies was significant, with all outcomes (n=3) in the SL group.                                                |
| No                               | 2 (11.1)                               | 13 (72.2) |                                                                                                                       |
| Yes                              | 3 (16.7)                               | 0 (0.0)   |                                                                                                                       |
| Psychologic Studies <sup>d</sup> |                                        |           | Outcome could not be evaluated statistically.                                                                         |
| No                               | 5 (27.8)                               | 13 (72.2) |                                                                                                                       |
| Age <sup>c</sup>                 |                                        |           | Age risk factor was not significant.                                                                                  |
| No                               | 3 (16.7)                               | 4 (22.2)  |                                                                                                                       |
| Yes                              | 2 (11.1)                               | 9 (50.0)  |                                                                                                                       |

|                                  |          |           |                                                                                             |
|----------------------------------|----------|-----------|---------------------------------------------------------------------------------------------|
| Education/Income <sup>d</sup>    |          |           | Outcome could not be evaluated statistically.                                               |
| No                               | 5 (27.8) | 13 (72.2) |                                                                                             |
| Ethnicity/Race <sup>c</sup>      |          |           | Ethnicity/race risk factor was not significant.                                             |
| No                               | 3 (16.7) | 12 (66.7) |                                                                                             |
| Yes                              | 2 (11.1) | 1 (5.6)   |                                                                                             |
| Environmental <sup>c</sup>       |          |           | Environmental risk factor was not significant.                                              |
| No                               | 2 (11.1) | 0 (0.0)   |                                                                                             |
| Yes                              | 3 (16.7) | 13 (72.2) |                                                                                             |
| Gender <sup>a</sup>              |          |           | Gender risk factor was significant, with all (n=8) outcomes in the SH group.                |
| No                               | 5 (27.8) | 5 (27.8)  |                                                                                             |
| Yes                              | 0 (0.0)  | 8 (44.4)  |                                                                                             |
| Geographic <sup>c</sup>          |          |           | Geographic risk factor was not significant.                                                 |
| No                               | 5 (27.8) | 12 (66.7) |                                                                                             |
| Yes                              | 0 (0.0)  | 1 (5.6)   |                                                                                             |
| Psychologic <sup>d</sup>         |          |           | Outcome could not be evaluated statistically.                                               |
| No                               | 5 (27.8) | 13 (72.2) |                                                                                             |
| Other <sup>d</sup>               |          |           | Outcome could not be evaluated statistically.                                               |
| No                               | 5 (27.8) | 13 (72.2) |                                                                                             |
| Single Mechanisms <sup>b</sup>   |          |           | Single physiologic mechanisms variable was significant, with more outcomes in the SH group. |
| Immune (IM)                      | 4 (26.7) | 0 (0.0)   |                                                                                             |
| Inflammation (IN)                | 1 (6.7)  | 4 (26.7)  |                                                                                             |
| Other (OT)                       | 0 (0.0)  | 6 (40.0)  |                                                                                             |
| Multiple Mechanisms <sup>d</sup> |          |           | Outcome could not be evaluated statistically.                                               |
| IMINOS                           | 0 (0.0)  | 2 (66.7)  |                                                                                             |
| INOS                             | 0 (0.0)  | 1 (33.3)  |                                                                                             |

<sup>1</sup>Abbreviations: immune-inflammation-oxidative stress, IMINOS; inflammation-oxidative stress, INOS. <sup>2</sup>Significant outcome group: not significant, NS; significantly higher, SH. Each entry includes totals (percentages). Significance evaluated with the Chi-Square test, *p*: a, ≤0.05; b, ≤0.01; c, >0.05; bold superscript identifies the use of the exact estimate; d, outcome not evaluated.



Table S4: Associations Between Selected Variables and Risk Factors with the Significant Outcome Group: Respiration Group of Other Respiration and Ecologic Setting of Greenness.

| VARIABLES <sup>1</sup>           | SIGNIFICANT OUTCOME GROUP <sup>2</sup> |          | COMMENTS                                           |
|----------------------------------|----------------------------------------|----------|----------------------------------------------------|
|                                  | NS                                     | SL       |                                                    |
| Respiration Group <sup>d</sup>   |                                        |          | Selection of other respiration study participants. |
| Other Respiration                | 6 (60.0)                               | 4 (40.0) |                                                    |
| Ecologic Setting <sup>d</sup>    |                                        |          | Selection of greenness ecologic setting.           |
| Greenness                        | 6 (60.0)                               | 4 (40.0) |                                                    |
| Publication Year <sup>c</sup>    |                                        |          | Publication year was not significant.              |
| 2009-2016                        | 1 (10.0)                               | 0 (0.0)  |                                                    |
| 2017-2023                        | 5 (50.0)                               | 4 (40.0) |                                                    |
| Country <sup>c</sup>             |                                        |          | Country was not significant.                       |
| Italy                            | 2 (20.0)                               | 2 (20.0) |                                                    |
| Spain                            | 3 (30.0)                               | 1 (10.0) |                                                    |
| United States                    | 1 (10.0)                               | 1 (10.0) |                                                    |
| Design <sup>c</sup>              |                                        |          | Design was not significant.                        |
| Cross Sectional                  | 4 (40.0)                               | 3 (30.0) |                                                    |
| Prospective Cohort               | 2 (20.0)                               | 1 (10.0) |                                                    |
| Surveillance <sup>c</sup>        |                                        |          | Surveillance was not significant.                  |
| Incidence                        | 2 (20.0)                               | 1 (10.0) |                                                    |
| Prevalence                       | 4 (40.0)                               | 3 (30.0) |                                                    |
| ICD-CM <sup>d</sup>              |                                        |          | Outcome could not be evaluated statistically.      |
| Other                            | 6 (60.0)                               | 4 (40.0) |                                                    |
| Questionnaire Dx <sup>d</sup>    |                                        |          | Outcome could not be evaluated statistically.      |
| Yes                              | 6 (60.0)                               | 4 (40.0) |                                                    |
| Medical Dx <sup>d</sup>          |                                        |          | Outcome could not be evaluated statistically.      |
| No                               | 6 (60.0)                               | 4 (40.0) |                                                    |
| Preexposure Studies <sup>d</sup> |                                        |          | Outcome could not be evaluated statistically.      |
| No                               | 6 (60.0)                               | 4 (40.0) |                                                    |
| Lung Studies <sup>d</sup>        |                                        |          | Outcome could not be evaluated statistically.      |
| No                               | 6 (60.0)                               | 4 (40.0) |                                                    |
| Psychologic Studies <sup>d</sup> |                                        |          | Outcome could not be evaluated statistically.      |
| No                               | 6 (60.0)                               | 4 (40.0) |                                                    |
| Age <sup>d</sup>                 |                                        |          | Outcome could not be evaluated statistically.      |
| No                               | 6 (60.0)                               | 4 (40.0) |                                                    |
| Education/Income <sup>d</sup>    |                                        |          | Outcome could not be evaluated statistically.      |
| No                               | 6 (60.0)                               | 4 (40.0) |                                                    |
| Ethnicity/Race <sup>d</sup>      |                                        |          | Outcome could not be evaluated statistically.      |
| No                               | 6 (60.0)                               | 4 (40.0) |                                                    |
| Environmental <sup>a</sup>       |                                        |          |                                                    |

|                                  |          |          |                                                                                |
|----------------------------------|----------|----------|--------------------------------------------------------------------------------|
| No                               | 5 (50.0) | 0 (0.0)  | Environmental risk factor was significant, with four outcomes in the SL group. |
| Yes                              | 1 (10.0) | 4 (40.0) |                                                                                |
| Gender <sup>d</sup>              |          |          | Outcome could not be evaluated statistically.                                  |
| No                               | 6 (60.0) | 4 (40.0) |                                                                                |
| Geographic <sup>c</sup>          |          |          | Geographic risk factor was not significant.                                    |
| No                               | 6 (60.0) | 3 (30.0) |                                                                                |
| Yes                              | 0 (0.0)  | 1 (10.0) |                                                                                |
| Psychologic <sup>d</sup>         |          |          | Outcome could not be evaluated statistically.                                  |
| No                               | 6 (60.0) | 4 (40.0) |                                                                                |
| Other <sup>d</sup>               |          |          | Outcome could not be evaluated statistically.                                  |
| No                               | 6 (60.0) | 4 (40.)  |                                                                                |
| Single Mechanisms <sup>c</sup>   |          |          | Single physiologic mechanisms variable was not significant.                    |
| Immune (IM)                      | 1 (20.0) | 0 (0.0)  |                                                                                |
| Other (OT)                       | 2 (40.0) | 2 (40.0) |                                                                                |
| Multiple Mechanisms <sup>d</sup> |          |          | Outcome could not be evaluated statistically.                                  |
| IMIN                             | 3 (60.0) | 2 (40.0) |                                                                                |

<sup>1</sup>Abbreviations: immune-inflammation, IMIN. <sup>2</sup>Significant outcome group: not significant, NS; significantly lower, SL. Each entry includes totals (percentages). Significance evaluated with the Chi-Square test, *p*: a,  $\leq 0.05$ ; b,  $\leq 0.01$ ; c,  $> 0.05$ ; bold superscript identifies the use of the exact estimate; d, outcome could not be evaluated statistically.

Table S5: Associations Between Selected Variables and Risk Factors with the Significant Outcome Group: Respiration Group of Other Respiration and Ecologic Setting of Air Pollution..

| VARIABLES <sup>1</sup>           | SIGNIFICANT OUTCOME GROUP <sup>2</sup> |         |           | COMMENTS                                                                                                                                                                         |
|----------------------------------|----------------------------------------|---------|-----------|----------------------------------------------------------------------------------------------------------------------------------------------------------------------------------|
|                                  | NS                                     | SL      | SH        |                                                                                                                                                                                  |
| Respiration Group <sup>d</sup>   |                                        |         |           | Selection of other respiration study participants.                                                                                                                               |
| Other Respiration                | 20 (40.0)                              | 4 (8.0) | 26 (52.0) |                                                                                                                                                                                  |
| Ecologic Setting <sup>d</sup>    |                                        |         |           | Selection of the air pollution ecologic setting.                                                                                                                                 |
| Air Pollution                    | 20 (40.0)                              | 4 (8.0) | 26 (52.0) |                                                                                                                                                                                  |
| Publication Year <sup>b</sup>    |                                        |         |           | Publication year was significant, with most outcomes (n=26) in the SH group.                                                                                                     |
| 2009-2016                        | 4 (8.0)                                | 2 (4.0) | 0 (0.0)   |                                                                                                                                                                                  |
| 2017-2023                        | 16 (32.0)                              | 2 (4.0) | 26 (52.0) |                                                                                                                                                                                  |
| Country <sup>b</sup>             |                                        |         |           | Country was significant. United States and Canada had three and one outcomes in the SL group, respectively. Italy had 10 and China had 9 outcomes in the SH group, respectively. |
| Australia                        | 2 (4.0)                                | 0 (0.0) | 2 (2.0)   |                                                                                                                                                                                  |
| Canada                           | 6 (12.0)                               | 1 (2.0) | 1 (2.0)   |                                                                                                                                                                                  |
| China                            | 0 (0.0)                                | 0 (0.0) | 9 (18.0)  |                                                                                                                                                                                  |
| Italy                            | 8 (16.0)                               | 0 (0.0) | 10 (20.0) |                                                                                                                                                                                  |
| Mexico                           | 0 (0.0)                                | 0 (0.0) | 3 (6.0)   |                                                                                                                                                                                  |
| Tiwan                            | 0 (0.0)                                | 0 (0.0) | 1 (2.0)   |                                                                                                                                                                                  |
| United States                    | 4 (8.0)                                | 3 (6.0) | 0 (0.0)   |                                                                                                                                                                                  |
| Design <sup>b</sup>              |                                        |         |           | Design was significant, with the cross sectional design contributing 15 outcomes to the SH group, and the prospective cohort contributing four outcomes to the SL group.         |
| Case Control                     | 1 (2.0)                                | 0 (0.0) | 0 (0.0)   |                                                                                                                                                                                  |
| Cross Sectional                  | 8 (16.0)                               | 0 (0.0) | 15 (30.0) |                                                                                                                                                                                  |
| Prospective Cohort               | 9 (18.0)                               | 4 (8.0) | 3 (6.0)   |                                                                                                                                                                                  |
| Retrospective Cohort             | 2 (4.0)                                | 0 (0.0) | 6 (12.0)  |                                                                                                                                                                                  |
| Time Series                      | 0 (0.0)                                | 0 (0.0) | 2 (4.0)   |                                                                                                                                                                                  |
| Surveillance <sup>b</sup>        |                                        |         |           | Surveillance was significant, with 18 prevalent outcomes in the SH group.                                                                                                        |
| Incidence                        | 11 (22.0)                              | 4 (8.0) | 8 (16.0)  |                                                                                                                                                                                  |
| Prevalence                       | 9 (18.0)                               | 0 (0.0) | 18 (36.0) |                                                                                                                                                                                  |
| ICD-CM <sup>b</sup>              |                                        |         |           | ICD-CM was significant, with the 9 <sup>th</sup> and 10 <sup>th</sup> editions each contributing three outcomes to the SH group.                                                 |
| 9                                | 1 (2.0)                                | 0 (0.0) | 3 (6.0)   |                                                                                                                                                                                  |
| 10                               | 6 (12.00)                              | 1 (2.0) | 3 (6.0)   |                                                                                                                                                                                  |
| Other                            | 13 (26.0)                              | 3 (6.0) | 20 (40)   |                                                                                                                                                                                  |
| Questionnaire Dx <sup>b</sup>    |                                        |         |           | Questionnaire Dx was significant, with 20 outcomes in the SH group.                                                                                                              |
| No                               | 8 (16.0)                               | 3 (6.0) | 6 (12)    |                                                                                                                                                                                  |
| Yes                              | 12 (24.0)                              | 1 (2.0) | 20 (40.0) |                                                                                                                                                                                  |
| Medical Dx <sup>a</sup>          |                                        |         |           | Medical Dx was significant, with six outcomes in the SH group and one in the SL group.                                                                                           |
| No                               | 11 (22.0)                              | 3 (6.0) | 18 (36.0) |                                                                                                                                                                                  |
| Yes                              | 7 (14.0)                               | 1 (2.0) | 6 (12.0)  |                                                                                                                                                                                  |
| Other                            | 2 (4.0)                                | 0 (0.0) | 2 (4.0)   |                                                                                                                                                                                  |
| Preexposure Studies <sup>b</sup> |                                        |         |           |                                                                                                                                                                                  |

|                                  |           |          |           |                                                                                                    |
|----------------------------------|-----------|----------|-----------|----------------------------------------------------------------------------------------------------|
| No                               | 20 (40.0) | 3 (6.0)  | 19 (38.0) | Preexposure studies variable was significant, with seven outcomes in the SH group.                 |
| Yes                              | 0 (0.0)   | 1 (2.0)  | 7 (14.0)  |                                                                                                    |
| Lung Studies <sup>b</sup>        |           |          |           | Lung studies variable was significant: two in SL group                                             |
| No                               | 19 (38.0) | 2 (4.0)  | 26 (52.0) |                                                                                                    |
| Yes                              | 1 (2.0)   | 2 (2.0)  | 0 (0.0)   |                                                                                                    |
| Psychologic Studies <sup>c</sup> |           |          |           | Psychologic studies variable was not significant.                                                  |
| No                               | 20 (40.0) | 4 (8.0)  | 24 (48.0) |                                                                                                    |
| Yes                              | 0 (0.0)   | 0 (0.0)  | 2 (4.0)   |                                                                                                    |
| Age <sup>c</sup>                 |           |          |           | Age risk factor was not significant.                                                               |
| No                               | 20 (40.0) | 4 (8.0)  | 22 (44.0) |                                                                                                    |
| Yes                              | 0 (0.0)   | 0 (0.0)  | 4 (8.0)   |                                                                                                    |
| Education/Income <sup>d</sup>    |           |          |           | Outcome could not be evaluated statistically.                                                      |
| No                               | 20 (40.0) | 4 (8.0)  | 26 (52.0) |                                                                                                    |
| Ethnicity/Race <sup>c</sup>      |           |          |           | Ethnicity/race risk factor was not significant.                                                    |
| No                               | 20 (40.0) | 3 (6.0)  | 26 (52.0) |                                                                                                    |
| Yes                              | 0 (0.0)   | 1 (2.0)  | 0 (0.0)   |                                                                                                    |
| Environmental <sup>b</sup>       |           |          |           | Environmental risk factor was significant, with 25 outcomes in the SH group.                       |
| No                               | 19 (38.0) | 0 (0.0)  | 1 (2.0)   |                                                                                                    |
| Yes                              | 1 (2.0)   | 4 (8.0)  | 25 (50.0) |                                                                                                    |
| Gender <sup>a</sup>              |           |          |           | Gender risk factor was significant, with four outcomes in the SH group.                            |
| No                               | 20 (40.0) | 3 (6.0)  | 22 (44.0) |                                                                                                    |
| Yes                              | 0 (0.0)   | 1 (2.0)  | 4 (8.0)   |                                                                                                    |
| Geographic <sup>c</sup>          |           |          |           | Geographic risk factor was not significant.                                                        |
| No                               | 20 (40.0) | 4 (8.0)  | 24 (48.0) |                                                                                                    |
| Yes                              | 0 (0.0)   | 0 (0.0)  | 2 (4.0)   |                                                                                                    |
| Psychologic <sup>c</sup>         |           |          |           | Psychologic risk factor was not significant.                                                       |
| No                               | 20 (40.0) | 4 (8.0)  | 24 (48.0) |                                                                                                    |
| Yes                              | 0 (0.0)   | 0 (0.0)  | 2 (4.0)   |                                                                                                    |
| Other <sup>a</sup>               |           |          |           | Other risk factor was significant, with five outcomes in the SH group.                             |
| No                               | 20 (40.0) | 3 (6.0)  | 21 (42.0) |                                                                                                    |
| Yes                              | 0 (0.0)   | 1 (2.0)  | 5 (10.0)  |                                                                                                    |
| Single Mechanisms <sup>c</sup>   |           |          |           | Single physiologic mechanisms variable was not significant.                                        |
| Immune (IM)                      | 2 (9.5)   | 0 (0.0)  | 2 (9.5)   |                                                                                                    |
| Oxidative Stress (OS)            | 0 (0.0)   | 0 (0.0)  | 1 (4.8)   |                                                                                                    |
| Other (OT)                       | 9 (42.9)  | 0 (0.0)  | 7 (33.3)  |                                                                                                    |
| Multiple Mechanisms <sup>b</sup> |           |          |           | Multiple physiologic mechanisms variable was significant, with 11 IMINOS outcomes in the SH group. |
| IMIN                             | 0 (0.0)   | 0 (0.0)  | 3 (10.3)  |                                                                                                    |
| IMINOS                           | 6 (20.7)  | 1 (3.4)  | 11 (37.9) |                                                                                                    |
| INOS                             | 3 (10.3)  | 3 (10.3) | 2 (6.9)   |                                                                                                    |

<sup>1</sup>Abbreviations: immune-inflammation, IMIN; immune-inflammation-oxidative stress, IMINOS; inflammation-oxidative stress, INOS. <sup>2</sup>Significant outcome group: not significant, NS; significantly lower, SL; significantly higher, SH. Each entry includes totals (percentages). Significance evaluated with the Chi-Square test, *p*: a, ≤0.05; b, ≤0.01; c, >0.05; bold superscript identifies the use of the exact estimate; d, outcome not evaluated statistically.

Table S6: Associations Between Selected Variables and Risk Factors with the Significant Outcome Group: Respiration Group of Other Respiration and Ecologic Setting of Wildfire.

| VARIABLES <sup>1</sup>           | SIGNIFICANT OUTCOME GROUP <sup>2</sup> |         |          | COMMENTS                                                                                                                             |
|----------------------------------|----------------------------------------|---------|----------|--------------------------------------------------------------------------------------------------------------------------------------|
|                                  | NS                                     | SL      | SH       |                                                                                                                                      |
| Respiration Group <sup>d</sup>   |                                        |         |          | Selection of other respiration study participants.                                                                                   |
| Other Respiration                | 5 (35.7)                               | 1 (7.1) | 8 (57.1) |                                                                                                                                      |
| Ecologic Setting <sup>d</sup>    |                                        |         |          | Selection of the wildfire ecologic setting.                                                                                          |
| Wildfire                         | 5 (35.7)                               | 1 (7.1) | 8 (57.1) |                                                                                                                                      |
| Publication Year <sup>c</sup>    |                                        |         |          | Publication year was not significant.                                                                                                |
| 2009-2016                        | 2 (14.3)                               | 0 (0.0) | 2 (14.3) |                                                                                                                                      |
| 2017-2023                        | 3 (21.4)                               | 1 (7.1) | 6 (42.9) |                                                                                                                                      |
| Country <sup>c</sup>             |                                        |         |          | Country was not significant.                                                                                                         |
| Indonesia                        | 0 (0.0)                                | 0 (0.0) | 1 (7.1)  |                                                                                                                                      |
| United States                    | 5 (35.7)                               | 1 (7.1) | 7 (50.0) |                                                                                                                                      |
| Design <sup>c</sup>              |                                        |         |          | Design was not significant.                                                                                                          |
| Case Control                     | 2 (14.3)                               | 1 (7.1) | 5 (35.7) |                                                                                                                                      |
| Cross Sectional                  | 2 (14.3)                               | 0 (0.0) | 3 (21.4) |                                                                                                                                      |
| Time Series                      | 1 (7.1)                                | 0 (0.0) | 0 (0.0)  |                                                                                                                                      |
| Surveillance <sup>d</sup>        |                                        |         |          | Outcome could not be evaluated statistically.                                                                                        |
| Prevalence                       | 5 (35.7)                               | 1 (7.1) | 8 (57.1) |                                                                                                                                      |
| ICD-CM <sup>a</sup>              |                                        |         |          | ICD-CM was significant, with four 9 <sup>th</sup> edition and three 10 <sup>th</sup> edition outcomes in the SH group, respectively. |
| 9                                | 5 (35.7)                               | 0 (0.0) | 4 (28.6) |                                                                                                                                      |
| 10                               | 0 (0.0)                                | 1 (7.1) | 3 (21.4) |                                                                                                                                      |
| Other                            | 0 (0.0)                                | 0 (0.0) | 1 (7.1)  |                                                                                                                                      |
| Questionnaire Dx <sup>d</sup>    |                                        |         |          | Outcome could not be evaluated statistically.                                                                                        |
| No                               | 5 (35.7)                               | 1 (7.1) | 8 (57.1) |                                                                                                                                      |
| Medical Dx <sup>c</sup>          |                                        |         |          | Medical Dx was not significant.                                                                                                      |
| No                               | 0 (0.0)                                | 0 (0.0) | 1 (7.1)  |                                                                                                                                      |
| Yes                              | 5 (35.7)                               | 1 (7.1) | 7 (50.0) |                                                                                                                                      |
| Preexposure Studies <sup>d</sup> |                                        |         |          | Outcome could not be evaluated statistically.                                                                                        |
| No                               | 5 (35.7)                               | 1 (7.1) | 8 (57.1) |                                                                                                                                      |
| Lung Studies <sup>d</sup>        |                                        |         |          | Outcome could not be evaluated statistically.                                                                                        |
| No                               | 5 (35.7)                               | 1 (7.1) | 8 (57.1) |                                                                                                                                      |
| Psychologic Studies <sup>d</sup> |                                        |         |          | Outcome could not be evaluated statistically.                                                                                        |
| No                               | 5 (35.7)                               | 1 (7.1) | 8 (57.1) |                                                                                                                                      |
| Age <sup>c</sup>                 |                                        |         |          | Age risk factor was not significant.                                                                                                 |
| No                               | 4 (28.6)                               | 0 (0.0) | 4 (28.6) |                                                                                                                                      |
| Yes                              | 1 (7.1)                                | 1 (7.1) | 4 (28.6) |                                                                                                                                      |
| Education/Income <sup>d</sup>    |                                        |         |          |                                                                                                                                      |

|                                  |          |          |          |                                                               |
|----------------------------------|----------|----------|----------|---------------------------------------------------------------|
| No                               | 5 (35.7) | 1 (7.1)  | 8 (57.1) | Outcome could not be evaluated statistically.                 |
| Ethnicity/Race <sup>c</sup>      |          |          |          | Ethnicity/race risk factor was not significant.               |
| No                               | 5 (35.7) | 1 (7.1)  | 7 (50.0) |                                                               |
| Yes                              | 0 (0.0)  | 0 (0.0)  | 1 (7.1)  |                                                               |
| Environmental <sup>b</sup>       |          |          |          | Environmental risk factor was significant.                    |
| No                               | 5 (35.7) | 0 (0.0)  | 0 (0.0)  |                                                               |
| Yes                              | 0 (0.0)  | 1 (7.1)  | 8 (57.1) |                                                               |
| Gender <sup>c</sup>              |          |          |          | Gender risk factor was not significant.                       |
| No                               | 3 (21.4) | 0 (0.0)  | 4 (28.6) |                                                               |
| Yes                              | 2 (14.3) | 1 (7.1)  | 4 (28.6) |                                                               |
| Geographic <sup>c</sup>          |          |          |          | Geographic risk factor was not significant.                   |
| No                               | 5 (35.7) | 0 (0.0)  | 7 (50.0) |                                                               |
| Yes                              | 0 (0.0)  | 1 (7.1)  | 1 (7.1)  |                                                               |
| Psychologic <sup>d</sup>         |          |          |          | Outcome could not be evaluated statistically.                 |
| No                               | 5 (35.7) | 1 (7.1)  | 8 (57.1) |                                                               |
| Other <sup>d</sup>               |          |          |          | Outcome could not be evaluated statistically.                 |
| No                               | 5 (35.7) | 1 (7.1)  | 8 (57.1) |                                                               |
| Single Mechanisms <sup>d</sup>   |          |          |          | Outcome could not be evaluated statistically.                 |
| Other (OT)                       | 2 (25.0) | 1 (12.5) | 5 (62.5) |                                                               |
| Multiple Mechanisms <sup>c</sup> |          |          |          | Multiple physiologic mechanisms variable was not significant. |
| IMINOS                           | 2 (33.3) | 0 (0.0)  | 2 (33.3) |                                                               |
| INOS                             | 1 (16.7) | 0 (0.0)  | 1 (16.7) |                                                               |

<sup>1</sup>Abbreviations: immune-inflammation-oxidative stress, IMINOS; inflammation-oxidative stress, INOS. <sup>2</sup>Significant outcome group: not significant, NS; significantly lower, SL; significantly higher, SH. Each entry includes totals (percentages). Significance evaluated with the Chi-Square test,  $p$ : a,  $\leq 0.05$ ; b,  $\leq 0.01$ ; c,  $> 0.05$ ; bold superscript identifies the use of the exact estimate; d, outcome not evaluated statistically.

Table S7: AOD-PM<sub>2.5</sub>, AOD-PM<sub>10</sub>, and AOD-NO<sub>2</sub> Means by Health Outcome, Ecologic Setting, and the Health Outcome by Ecologic Setting Interaction.

| AOD-AIR POLLUTION <sup>1</sup>                   | HEALTH OUTCOME |             | ECOLOGIC SETTING |               |          | HEALTH OUTCOME BY ECOLOGIC SETTING INTERACTION |                      |                 |                   |                           |                      |
|--------------------------------------------------|----------------|-------------|------------------|---------------|----------|------------------------------------------------|----------------------|-----------------|-------------------|---------------------------|----------------------|
|                                                  | Asthma         | Respiration | Green            | Air Pollution | Wildfire | Asthma-Green                                   | Asthma-Air Pollution | Asthma-Wildfire | Respiration-Green | Respiration-Air Pollution | Respiration-Wildfire |
| AOD-PM <sub>2.5</sub> <sup>c,c,c</sup><br>(n=74) | 26.9           | 30.3        | .                | 23.7          | 33.5     | .                                              | 22.8                 | 31.0            | .                 | 24.6                      | 36.0                 |
| AOD-PM <sub>10</sub> <sup>c,d,d</sup><br>(n=19)  | 54.0           | 39.7        | .                | 46.8          | .        | .                                              | 54.0                 | .               | .                 | 39.7                      | .                    |
| AOD-NO <sub>2</sub> <sup>c,d,d</sup><br>(n=15)   | 9.3            | 12.4        | .                | 10.9          | .        | .                                              | 9.3                  | .               | .                 | 12.4                      | .                    |

<sup>1</sup>AOD-air pollution means for PM<sub>2.5</sub>, PM<sub>10</sub>, and NO<sub>2</sub> by health outcome, ecologic setting, and the health outcome by ecologic setting interaction. Unit of measurements are µg/m<sup>3</sup> for particulates and ppb for NO<sub>2</sub>. Results produced by utilizing SAS Proc GLM, analysis of variance. Significance, *p*: a, ≤0.05; b, ≤0.01; c, >0.05; d, outcome was not evaluated statistically.

Table S8: Analysis of Individual and Multiple Physiologic Mechanisms of Immune, Inflammation, and Oxidative Stress by Health Outcome and Ecologic Setting Main Effects.

| PHYSIOLOGIC MECHANISMS <sup>1</sup> | TOTAL <sup>2</sup>       | HEALTH OUTCOME <sup>2</sup> |                        | ECOLOGIC SETTING <sup>2</sup> |               |                        |
|-------------------------------------|--------------------------|-----------------------------|------------------------|-------------------------------|---------------|------------------------|
|                                     |                          | Asthma                      | Respiration            | Greenness                     | Air Pollution | Wildfire               |
| Immune (IM)                         | 9 (4.6)                  | 8 (4.0)                     | 1 (0.5)                | 5 (2.5)                       | 0 (0.0)       | 4 (2.0)                |
| Inflammation (IN)                   | 24 (12.1)                | 20 (10.1)                   | 4 (2.0)                | 0 (0.0)                       | 19 (9.6)      | 5 (2.5)                |
| Oxidative Stress (OS)               | 7 (3.5)                  | 6 (3.0)                     | 1 (0.5)                | 4 (2.0)                       | 3 (1.5)       | 0 (0.0)                |
| Other (OT)                          | 70 (35.4)                | 42 (21.2)                   | 28 (14.1)              | 16 (8.1)                      | 40 (20.2)     | 14 (7.1)               |
| IMIN                                | 24 (12.1)                | 16 (8.1)                    | 8 (4.0)                | 16 (8.1)                      | 8 (4.0)       | 0 (0.0)                |
| IMINOS                              | 47 (23.7)                | 25 (12.6)                   | 22 (11.1)              | 0 (0.0)                       | 41 (20.7)     | 6 (3.0)                |
| INOS                                | 17 (8.6)                 | 7 (3.5)                     | 10 (5.1)               | 0 (0.0)                       | 14 (7.1)      | 3 (1.5)                |
| Total                               | 198 (100.0) <sup>b</sup> | 124 (62.6)                  | 74 (37.4) <sup>a</sup> | 41 (20.7)                     | 125 (63.1)    | 32 (16.2) <sup>b</sup> |

<sup>1</sup>Abbreviations: immune-inflammation, IMIN; immune-inflammation-oxidative stress, IMINOS; inflammation-oxidative stress, INOS. <sup>2</sup>Physiologic mechanism totals (percentages) are entered in each cell. Significance was evaluated using the Chi-Square test,  $p$ : a,  $p \leq 0.05$ ; b,  $p \leq 0.01$ ; bold superscript identifies the use the exact estimate.



Table S9: Analysis of Individual Physiologic Mechanisms of Immune, Inflammation, and Oxidative Stress by Health Outcome and Ecologic Setting.

| PHYSIOLOGIC MECHANISMS <sup>1</sup> | TOTAL <sup>2</sup>       | HEALTH OUTCOME <sup>2</sup> |             | ECOLOGIC SETTING <sup>2</sup> |               |                        |
|-------------------------------------|--------------------------|-----------------------------|-------------|-------------------------------|---------------|------------------------|
|                                     |                          | Asthma                      | Respiration | Greenness                     | Air Pollution | Wildfire               |
| Immune                              | 80 (24.0)                | 49 (14.7)                   | 31 (9.3)    | 21 (6.3)                      | 49 (14.7)     | 10 (3.0)               |
| Inflammation                        | 112 (33.6)               | 68 (20.4)                   | 44 (13.2)   | 16 (4.8)                      | 82 (24.6)     | 14 (4.2)               |
| Oxidative Stress                    | 71 (21.3)                | 38 (11.4)                   | 33 (9.9)    | 4 (1.2)                       | 58 (17.4)     | 9 (2.7)                |
| Other                               | 70 (21.0)                | 42 (12.6)                   | 28 (8.4)    | 16 (4.8)                      | 40 (12.0)     | 14 (4.2) <sup>b</sup>  |
| Total                               | 333 (100.0) <sup>b</sup> | 197 (59.2) <sup>c</sup>     | 136 (40.8)  | 57 (17.1)                     | 229 (68.8)    | 47 (14.1) <sup>b</sup> |

<sup>1</sup>Physiologic mechanisms by health outcome and ecologic setting. Cell entries are totals (percentages). Significance was evaluated with the Chi-Square test,  $p$ : a,  $p \leq 0.05$ ; b,  $p \leq 0.01$ ; c,  $p > 0.05$ ; a or b letters in bold font indicates the use of the exact estimate.
